# Supplementary material for: Impact of Diabetes Type 1 in Children on Autonomic Modulation at Rest and in Response to the Active Orthostatic Test
Source: PLoS One. 2016 Oct 27;11(10):e0164375. doi: 10.1371/journal.pone.0164375 (PMC5082837; doi:10.1371/journal.pone.0164375)
Supplement: S1 File — (XLS) [file pone.0164375.s001.xls]

## Sheet: Characteristics of the children
nº	Age	Sex M (1) F (2)	Time of diagnosis (years)	HR	SBP (mmH2O)	SBD (mmHg)	Weight (kg)	Height (m)	BMI (kg.m²)	Percentage body fat	Casual blood glucose
1	12	female	0.3	102	110	60	36.7	1.51	16.09	30	93
2	9	female	4	90	110	60	28	1.31	16.3	24	222
3	12	male	5	78	120	70	35	1.52	15.1	13.3	210
4	14	male	3	98	110	70	56.1	1.71	19.2	21.1	213
5	11	male	5	68	90	50	32.3	1.48	14.6	11.2	116
6	14	male	7	79	110	70	68.8	1.71	23.5	24.3	87
7	11	male	9	91	90	60	35.8	1.45	17	16.7	250
8	7	male	3	78	100	60	23.6	1.22	15.9	20.3	189
9	12	female	1	68	110	60	40.5	1.51	17.8	24	217
10	14	female	4	88	100	70	50.5	1.56	20.7	0	0
11	13	female	5.5	120	110	70	62.8	1.58	25.2	29.8	160
12	13	male	3	99	120	80	46	1.68	16.3	5.5	169
13	9	male	1	76	100	70	32.5	1.32	18.4	21	162
14	13	male	6	81	120	80	44.2	1.53	18.9	29.7	171
15	12	male	9.5	60	110	60	61.7	1.73	20.6	17.5	108
16	15	male	7	82	100	60	44.5	1.6	17.4	17.4	488

## Sheet: TC6
n°	TC6'	Inicial	Inicial	Inicial	Inicial	Inicial	3'	3'	6'	6'	6'	6'	6'	Após 2'	Após 2'	Após 2'	Após 2'	Após 2'	Distância
	Nome	PA	FC	FR	Sat O2	Borg	FC	Sat O2	PA	FC	FR	Sat O2	Borg	PA	FC	FR	SatO2	Borg	metros
1	Bárbara Folcato de Freitas
2	Diego Salvador Clemente	120/60	82	16	98	0/6	111	98	130/60	110	20	99	0/6	120/70	84	16	98	0/6	588
3	Franciele Gonçalves	110/80	88	20	99	0/6	167	99	140/80	170	28	99	1/7,5	120/80	127	24	99		668
4	Graziele Cristina Maino Rosa	120/80	78	16	98	0/6	128	98	140/90	133	28	98	6.9	120/90	92	24	98	0/9	578
5	Marcelo Ernandes Coelho	120/70	103	16	97	0/6	147	98	140/80	179	27	97	11.3	120/90	130	24	98	0/6	720
6	Marieli Lecticia Mendes Arruda
7	Matheus Antonio Lourenço de O. Santos
8	Tatiane Del Castilho Galhardo	110/70	92	16	97	0/11	142	97	140/70	148	24	98	2.13	110/70	100	20	98	1.11	604
9	Thiago Henrique P. Silva
10	Vanessa Lopes Benedito da Cruz Silva	Não fez devido a chuva
11	Ingredi Salgueiro Jarandilha	110/70	68	16	98	0/6	92	95	130/80	110	24	97	0/9	120/80	90	20	98	0/6	720
12	Guilherme Vinicius araujo Orbolato	110/70	80	20	98	0/6	135	98	120/80	128	24	97	2;8	110/80	92	20	98	0/6	665
13	Mariana Correa
14	Rodrigo Santos
15	Gustavo Rodrigues
16	Ana Letícia Silveira
17	Amanda Montes Gramito RET
18	Felipe R C Lucas
19	Leticia Nunes Padilha
20	Fernando Menardi
21	Maria Gabriela dos Santos	110/70	72	16	97	0/6	126	96	140/80	144	28	97	3;8	120/80	88	20	97	0/7	615

## Sheet: Glicemia
	Nome	Jejum exame	pós-prandial	glicose	HbA1C	Tempo	Glicose média estimada
1	Bárbara Folcato de Freitas	117	134	180	7.8	9 anos
2	Diego Salvador Clemente
3	Franciele Gonçalves
4	Graziele Cristina Maino Rosa
5	Marcelo Ernandes Coelho
6	Marieli Lecticia Mendes Arruda	118		170	8.3	22 anos	191.5
7	Matheus Antonio Lourenço de O. Santos	54		114	10.12	9 anos
8	Tatiane Del Castilho Galhardo
9	Thiago Henrique P. silva			162		10 anos
10	Vanessa Lopes Benedito da Cruz Silva	45				4 anos
11	Ingredi Salgueiro Jarandilha	110			6.2	11 anos
12	Guilherme Vinicius araujo Orbolato	84
13	Mariana Correa	290				8 anos
14	Rodrigo Santos	121				24 anos
15	Gustavo Rodrigues	156		180		14 anos
16	Ana Leticia Silveira	304		70		15 anos
17	Amanda Montes Gramito RET	173			8.5	15 anos
18	Felipe R C Lucas			126		7 anos
19	Leticia Nunes Padilha	135		179	9.5	7 anos
20	Fernando Menardi	199				5 anos e meio
21	Maria Gabriela dos Santos	89				3 anos
